# Supplementary material for: The presymptomatic treatment with 3HFWC nanosubstance decreased plaque load in 5XFAD mouse model of Alzheimer's disease
Source: PubMed Central journal article supplement (PMC10915986; doi:10.1111/cns.14188), 2023-03-27
Supplement: CNS-30-e14188-s001.pdf [file CNS-30-e14188-s001.pdf]

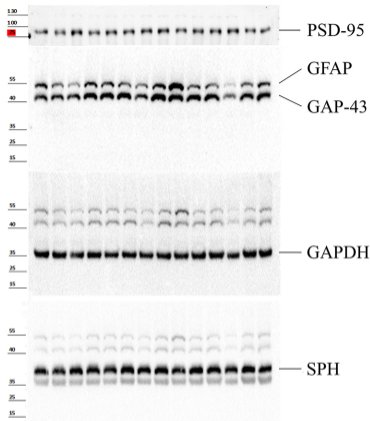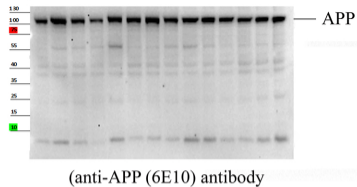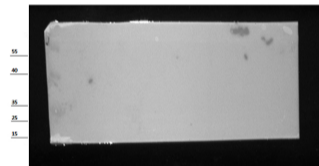

1. Blots cut at 70 kDa
2. > 70 kDa – blotted with anti-PSD-95 antibody (95 kDa)
3. < 70 kDa – blotted with anti-GAP-43 antibody (46 kDa)
4. < 70 kDa – blotted with anti-GFAP antibody (~50 kDa)
5. < 70 kDa – blotted with anti-GAPDH antibody (36 kDa) – end.ctrl
6. < 70 kDa – blotted with anti-SPH antibody (38 kDa)
